# Supplementary figures and images for: Chlorambucil-Loaded Graphene-Oxide-Based Nano-Vesicles for Cancer Therapy
Source: MDPI journal article supplement (doi:10.3390/pharmaceutics15020649), 2023-02-15

## Supplementary Figures

Figure S1.

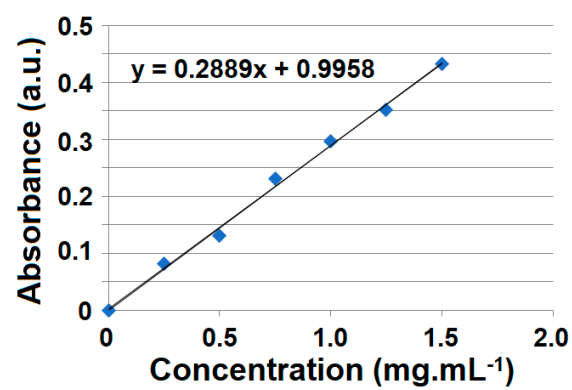

Figure S1. The calibration curve of CHL at 264 nm.

Supplement: s1 [file s1]
